# Supplementary material for: Deciphering highly similar multigene family transcripts from Iso-Seq data with IsoCon
Source: PubMed Central journal article supplement (PMC6214943; doi:10.1038/s41467-018-06910-x), 2018-11-02
Supplement: 41467_2018_6910_MOESM2_ESM.pdf [file 41467_2018_6910_MOESM2_ESM.pdf]

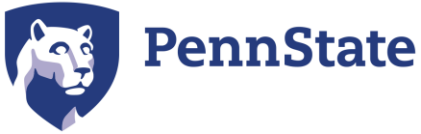

**Paul Medvedev**  
**Assistant Professor**  
Department of Computer Science and Engineering  
Department of Biochemistry and Molecular Biology  
The Pennsylvania State University

506B Wartik Lab  
University Park, PA 16802-5807  
pzm11@psu.edu  
814-865-0193

## LEGENDS FOR SUPPLEMENTARY DATA FILES

**Supplementary Dataset 1.** Splice coordinates (chrY) of the 668 alignments from the 168 known database transcripts used as a database of known sites. Each row corresponds to a distinct alignment, and transcripts with multiple alignments have multiple rows. An empty splice coordinate column means that the transcript had no splice junction.

**Supplementary Dataset 2.** Sequences of IsoCon transcripts, their alignments, and the gene family graphs.
